# Supplementary material
Source: PubMed Central journal article supplement (PMC10723194)
Supplement: ijsem-72-5608-s001.pdf [file ijsem-72-5608-s001.pdf]

## Supplementary Materials

Details of 16S rRNA gene copy numbers in the genomes used in the analysis are represented in Table S1. The genomes were obtained from the NCBI database while the 16S rRNA gene sequence was downloaded from the individual genome. Some genomes had more than one copy of the 16S rRNA gene. The copies were analyzed and found to be the same. Thus, only one copy was used in drawing the phylogenetic tree.

**Table S1:** 16S rRNA gene copy number in the related genomes.

| Isolate                                                     | Copies | Region                                                                                       | Genome (Accession number) |
|-------------------------------------------------------------|--------|----------------------------------------------------------------------------------------------|---------------------------|
| <i>Bdellovibrio</i> sp. LBG001 <sup>T</sup>                 | 2      | 953588..955101<br>1759940..1761453                                                           | NZ_CP093442.1             |
| <i>B. bacteriovorus</i> 109J                                | 1      | 1036899..1038412                                                                             | NZ_CP007656.1             |
| <i>B. bacteriovorus</i> strain SSB218315                    | 1      | 2952287-2950774                                                                              | NZ_CP020946.1             |
| <i>B. bacteriovorus</i> HD100 <sup>T</sup>                  | 2      | 819576..821089<br>1687640..1689153                                                           | NC_005363.1               |
| <i>B. bacteriovorus</i> W                                   | 2      | 608416-609941<br>1360268-1361793                                                             | CP002190.1                |
| <i>B. bacteriovorus</i> Tiberius                            | 2      | 842390..843894<br>1837658..1839162                                                           | NC_019567.1               |
| <i>B. bacteriovorus</i> RO                                  | 1      | 171..1684                                                                                    | NZ_LUKE01000007.1         |
| <i>Bdellovibrio</i> sp. KM01                                | 2      | 1825819..1827332<br>3112760..3114273                                                         | NZ_CP058348.1             |
| <i>Bdellovibrio</i> sp. NC01                                | 2      | 858146..859659<br>1722252..1723765                                                           | NZ_CP030034.1             |
| <i>Bdellovibrio</i> sp. ZAP7                                | 2      | 1960532..1962045<br>3284792..3286305                                                         | NZ_CP030082.1             |
| <i>Bdellovibrio</i> sp. qaytius                             | 1      | 663487..664991                                                                               | CP025734.1                |
| <i>Pseudobdellovibrio exovorax</i> JSS                      | 1      | 751703..753216                                                                               | NC_020813.1               |
| <i>Halobacteriovorax marinus</i> SJ <sup>T</sup>            | 2      | 233651...235207<br>1891950...1893506                                                         | NC_016620.1               |
| <i>Halobacteriovorax</i> sp. BALOs_7                        | 2      | 246974...248526<br>1293221..1294773                                                          | NZ_CP027772.1             |
| <i>Bacteriovorax stolpii</i> DSM 12778 <sup>T</sup>         | 2      | 262357..263907<br>2166394..2167944                                                           | NZ_CP025704.1             |
| <i>Fluviispira sanaruensis</i> RF1110005 <sup>T</sup>       | 5      | 396712..398248<br>485340..486876<br>2375456..2376992<br>2866755..2868291<br>3332162..3333698 | NZ_AP019368.1             |
| <i>Silvanigrella aquatica</i> MWH-Nonnen-W8red <sup>T</sup> | 5      | 388357..389887<br>527078..528608<br>2286305..2287835<br>2741060..2742590<br>3157553..3159083 | NZ_CP017834.1             |

**Table S2:** A 16S rRNA pairwise alignment of *Bdellovibrio* sp LBG001<sup>T</sup> with other members of the *Bdellovibrio* genus

| Bacteria*                                      | Alignment identity (%) |
|------------------------------------------------|------------------------|
| <i>B. bacteriovorus</i> HD100 <sup>T</sup>     | 97.2                   |
| <i>B. bacteriovorus</i> 109J                   | 97.2                   |
| <i>B. bacteriovorus</i> SSB218315              | 97.2                   |
| <i>B. bacteriovorus</i> R0                     | 97.8                   |
| <i>B. bacteriovorus</i> Tiberius               | 97.2                   |
| <i>B. bacteriovorus</i> W                      | 95.5                   |
| <i>Bdellovibrio</i> sp NC01                    | 96.5                   |
| <i>Bdellovibrio</i> zap7                       | 96.8                   |
| <i>Bdellovibrio</i> sp KM01                    | 96.8                   |
| <i>Bdellovibrio</i> sp. qaytius <sup>T</sup>   | 92.2                   |
| <i>Bdellovibrio exovor</i> us JSS <sup>T</sup> | 92.7                   |

\* Only members of the *Bdellovibrio* genus

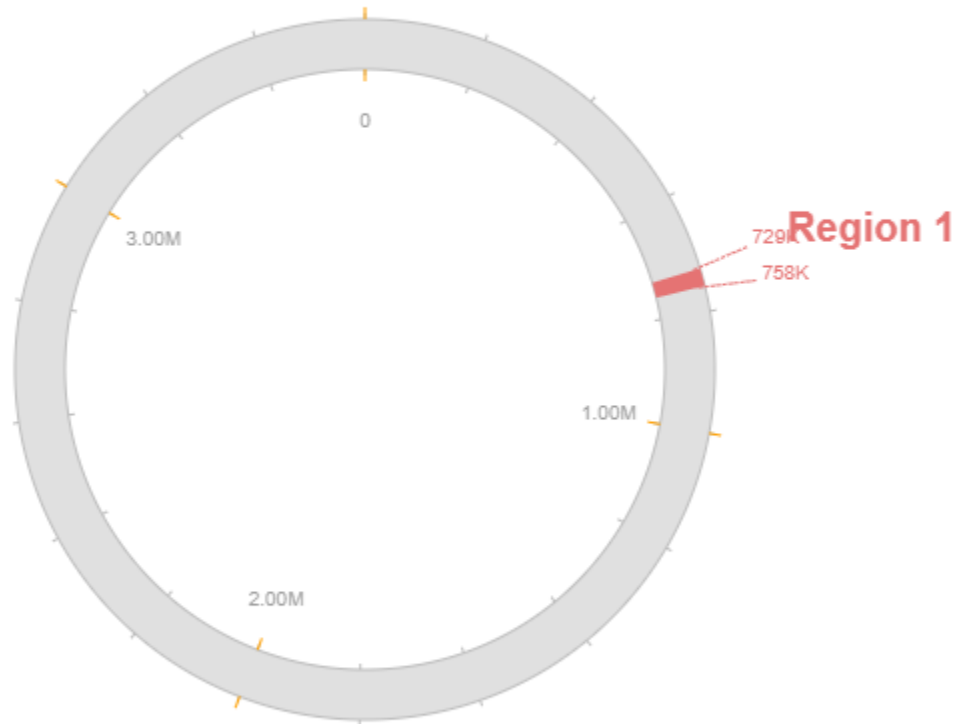

**Fig S1: Location of degenerate prophage (Region 1) in LBG001<sup>T</sup>**

The prophage sequence is located at 728,575-758,048 of the LBG001<sup>T</sup> genome.

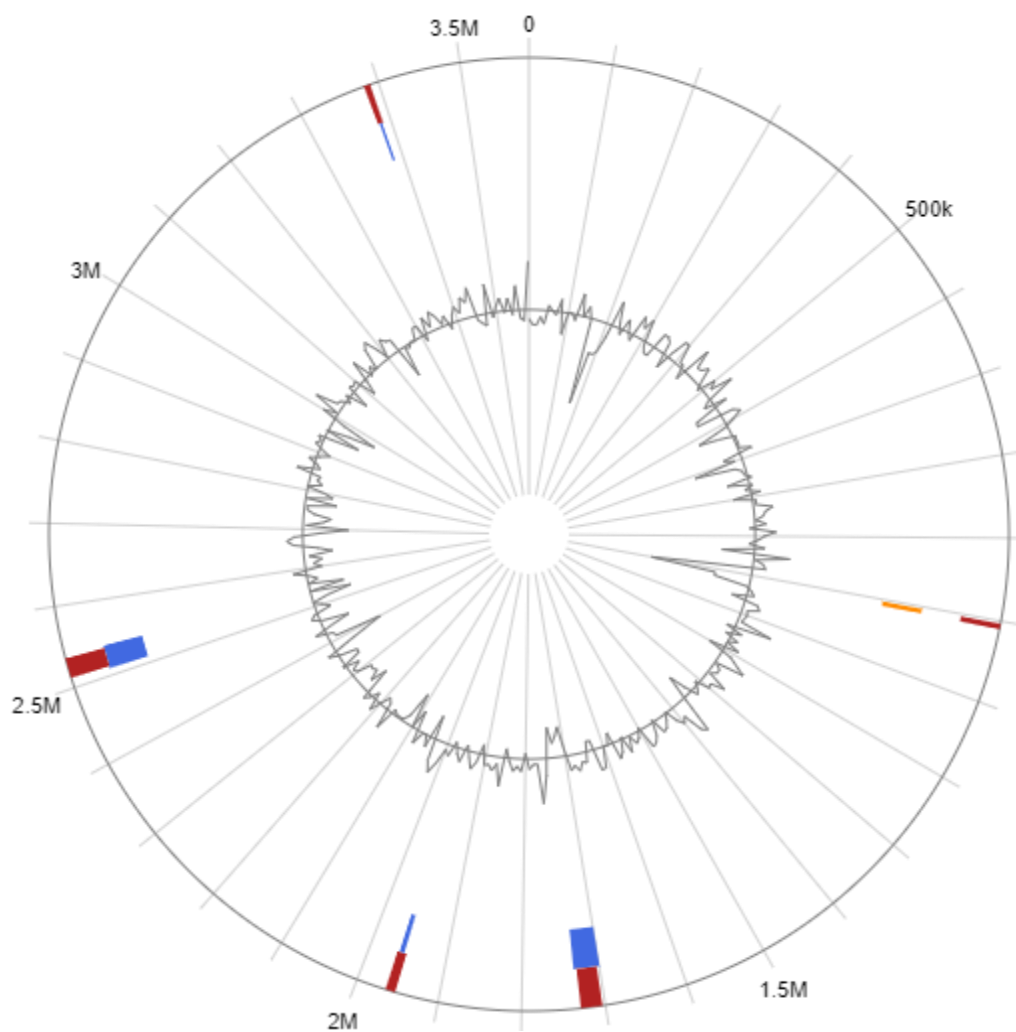

**Fig S2:** Location of 5 genomic islands within LBG001<sup>T</sup>

Coordinate numbers of genomic islands within LBG001<sup>T</sup>

| Islands | Start     | End       | Size   |
|---------|-----------|-----------|--------|
| 1.      | 1,003,250 | 1,009,985 | 6,735  |
| 2.      | 1,703,472 | 1,729,408 | 25,936 |
| 3.      | 1,952,347 | 1,964,324 | 11,977 |
| 4.      | 2,512,597 | 2,536,676 | 24,079 |
| 5.      | 3,382,539 | 3,389,809 | 7,270  |

### **Text 1. Housekeeping genes that were used to construct the phylogenetic analysis**

The 30 housekeeping genes were extracted from each analyzed genome by using the AMPHORA software. 30 house-keeping genes are: *dnaG*, *frr*, *infC*, *nusA*, *pgk*, *pyrG*, *rpIA*, *rpIB*, *rpIC*, *rpID*, *rpIE*, *rpIF*, *rpIK*, *rpIL*, *rpIM*, *rpIN*, *rpIP*, *rpIS*, *rpIT*, *rpoB*, *rpsB*, *rpsC*, *rpsE*, *rpsI*, *rpsJ*, *rpsK*, *rpsM*, *rpsS*, *smpB*, *tsf*

### **Text 2. Details of the experimental protocol for a microscopic view of the *Bdellovibrio***

#### **Materials and Methods**

Purified cells of wild-type *B. bacteriovorus* 109J and *B. reynosensis* LBG001<sup>T</sup> were prepared as follows. Each predator was grown on  $\sim 10^{10}$  CFU of *K. pneumoniae* (ATCC 43816) in 1 mL of (2-hydroxyethyl)-1-piperazineethanesulphonic acid) Complete buffer (HEPES) at 30°C with aeration until >99% of prey cells were lysed, and a high titer of predator was apparent by examination under dark field microscopy ( $\sim 48$  h). HEPES buffer was made by dissolving 3 g of HEPES into 500 mL deionized water, then adding 0.4 ml 10 N NaOH, 1.5 ml 1 M MgCl<sub>2</sub>, and 1 ml 1 M CaCl<sub>2</sub>, filtering through a 0.22  $\mu$ m filter, and stored at 4°C for up to 2 months. The remaining prey cells and debris were removed by differential centrifugation at 1500 RCF for 2 min, and the supernatant was filtered consecutively through 0.45  $\mu$ m and 0.22  $\mu$ m PVDF 4 mm syringe filters (Millex<sup>TM</sup>-HV SLHVR04NL, SLGVR04NL) attached to 1cc syringes to obtain pure cultures of *B. bacteriovorus* and *B. reynosensis*. Note that the 0.22  $\mu$ m filter units clog after passing  $\sim 0.2$  mL through, requiring changing of the filter unit several times to achieve filtration of the 1 mL volume. The purified predator cells were labelled briefly with a 1/500 volume of BactoView<sup>TM</sup> Live Green stain (Biotium, 40102) at 37°C in a microfuge tube for 5 min. Unincorporated dye was

removed by pelleting the cells at 21,000 RCF for 2 min, removing the supernatant, washing the cells once, and resuspending in 0.5 mL of HEPES buffer. Labelled predator was added a multiplicity of infection of ~4 to freshly grown *Klebsiella pneumoniae* (ATCC 43816) resuspended in 1 mL of HEPES buffer and incubated in a 2 mL microfuge tube at 30°C with aeration. After 10 and 80 min, half the volume was removed, and differential centrifugation at 1100 RCF for 2 min was used to remove most of the extracellular, unattached predator cells from the prey cells: The cell pellet, which was very loose, was washed once with HEPES, centrifuged again at 1100 RCF for 2 min, the supernatant removed, and the cell pellet of infected prey cells was resuspended in 0.5 mL HEPES. A 4 µl volume of the infected prey cells was examined on agarose pads on microscope slides by 100x bright field and fluorescence microscopy using the FITC channel on a Revolve microscope (Echo Laboratories, RVL-100-B2).

## Reference

Csaba Kerepesi, Dániel Bánky, Vince Grolmusz, *AmphoraNet: The webserver implementation of the AMPHORA2 metagenomic workflow suite*, *Gene*, Volume 533, Issue 2, 10 January 2014, Pages 538-540, ISSN 0378-1119, <http://dx.doi.org/10.1016/j.gene.2013.10.015>
